# Supplementary material for: Differential impact of the triple helix dissociation degree of collagen on the binding efficiency with cancer cells and normal cells
Source: Royal Society of Chemistry journal article supplement (doi:10.1039/d4nj00109e), 2024-01-01
Supplement: d4nj00109e1.pdf [file d4nj00109e1.pdf]

## Supplementary Material

### **Differential Impact of Triple Helix Dissociation Degree of Collagen on the Binding Efficiency of Cancer Cells and Normal Cells**

Delai Kang<sup>1#</sup>, Ke Li<sup>1#</sup>, Long Zuo<sup>1</sup>, Hui Wu<sup>1</sup>, Siying Huang<sup>1</sup>, Juntao Zhang<sup>1</sup>, Benmei Wei<sup>1</sup>,

Chengzhi Xu<sup>1\*</sup>, Haibo Wang<sup>2\*</sup>

<sup>1</sup> School of Chemistry and Environmental Engineering, Wuhan Polytechnic University, Wuhan, Hubei, China

<sup>2</sup> College of Life Science and Technology, Hubei Key Laboratory of Quality Control of Characteristic Fruits and Vegetables, Hubei Engineering University, Xiaogan, Hubei, China

\*To whom correspondence should be addressed: wanghaibo@whpu.edu.cn

### (1) Circular dichroism analysis of collagen samples

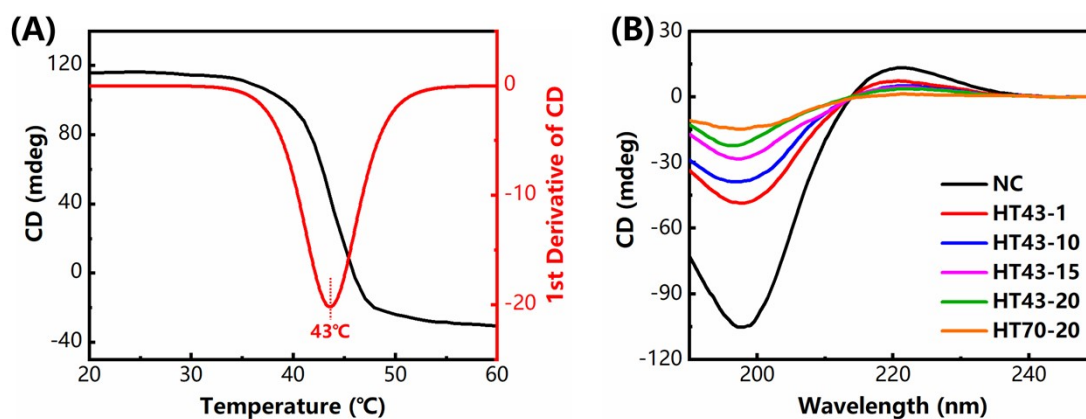

**Figure S1.** Circular dichroism thermal transition curve and derivative analysis of natural collagen (A), and circular dichroism spectra of collagen samples subjected to heat treatment under different conditions (B). NC represents natural collagen, and the samples after heat treatment are labeled as “HT” with corresponding temperature (°C) and treatment time (min) indicated.

**(2) Analysis of the binding efficiency of collagen samples to MCF-7 and HUVEC through fluorescence labeling experiments**

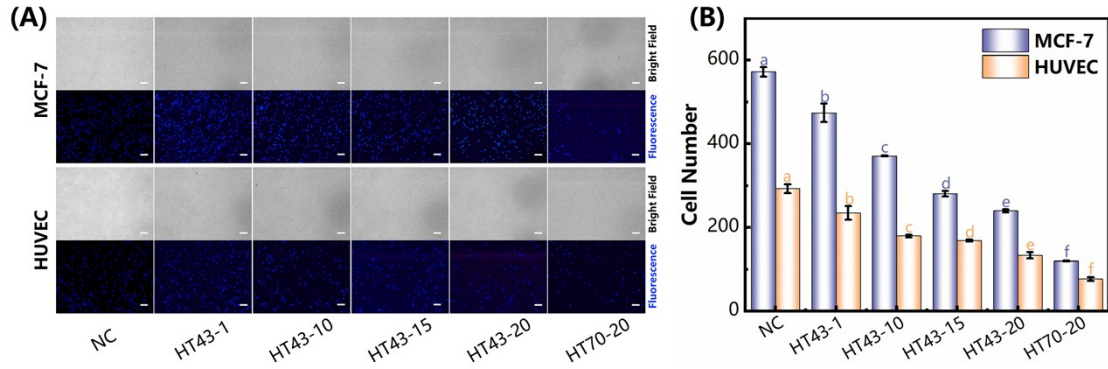

**Figure S2.** Fluorescence labeling images depicting the cell binding capacity of collagen with different triple helix dissociation degree. (A) Fluorescence labeling images, scale bar: 100  $\mu\text{m}$ . (B) Quantitative results of fluorescence-labeled cells. Means that contain different letters are significantly different at  $P < 0.05$ . NC represents natural collagen, and the samples after heat treatment are labeled as “HT” with corresponding temperature ( $^{\circ}\text{C}$ ) and treatment time (min) indicated.

**(3) Analysis of the differential binding efficiency of collagen samples to MCF-7 and HUVEC through selective capture experiments in a co-culture system**

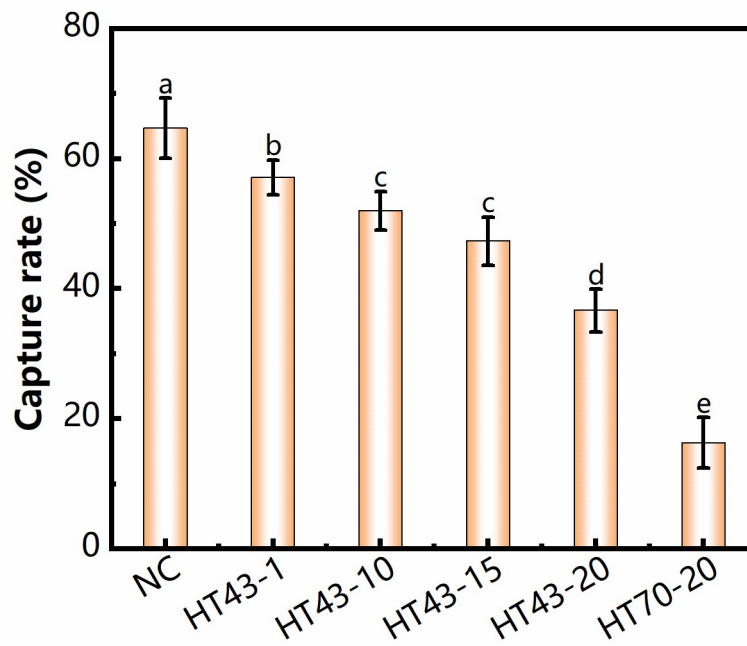

**Figure S3.** Selective capture rate of MCF-7 cells by different collagen samples in co-culture systems. Means that contain different letters are significantly different at  $P < 0.05$ . NC represents natural collagen, and the samples after heat treatment are labeled as “HT” with corresponding temperature ( $^{\circ}\text{C}$ ) and treatment time (min) indicated.

**(4) Analysis of the Effects of Collagen Samples on the Viability of MCF-7 and HUVEC Cells Using CCK-8 Assays**

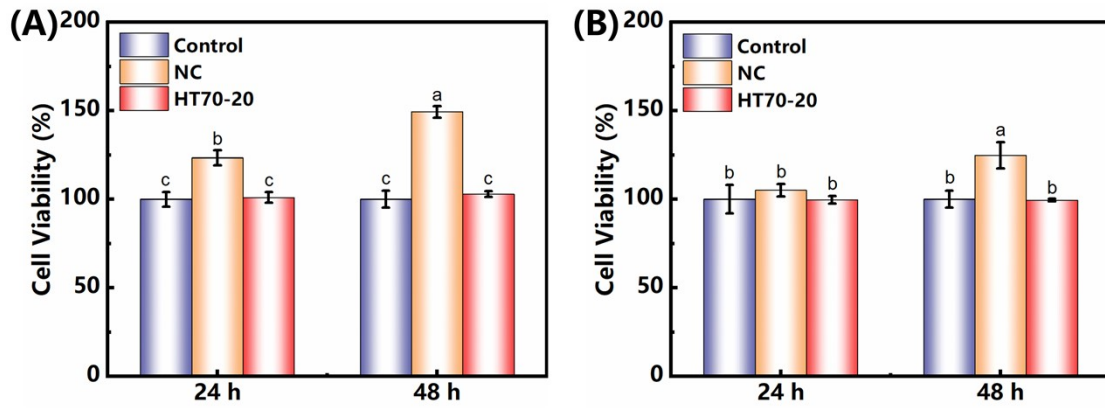

**Figure S4.** Differential effects of natural collagen (NC) and highly triple-helix dissociated collagen (HT70-20) on the viability of MCF-7 cells (A) and HUVEC cells (B).

**(5) Evaluation of the Impact of Collagen Samples on the Migration Capabilities of MCF-7 and HUVEC Cells Through Scratch Assays**

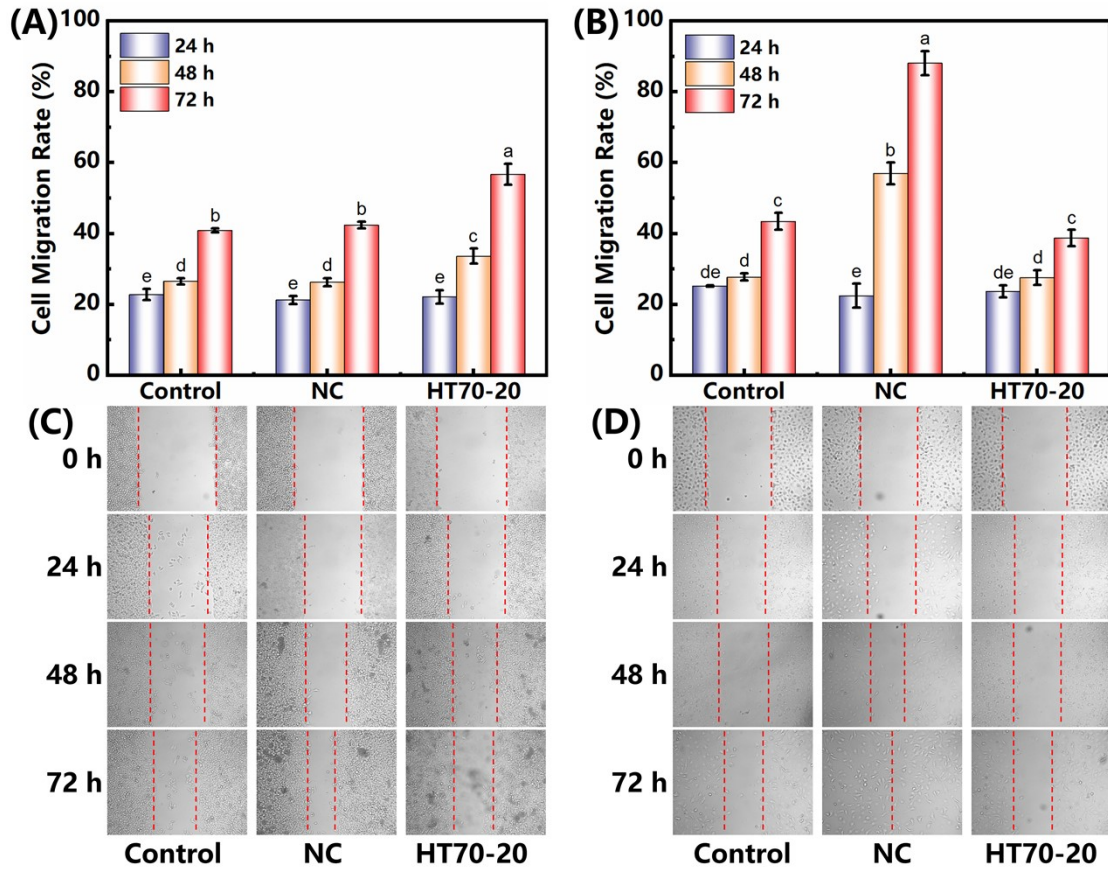

**Figure S5.** Differential effects of natural collagen (NC) and highly triple-helix dissociated collagen (HT70-20) on the migration capabilities of MCF-7 cells (A, C) and HUVEC cells (B, D). A, B present the analysis of cell migration rates based on scratch assays; C, D show images from the scratch assays.
